# Supplementary material for: Radical-mediated C–N bond activation in 3,5-diamino-4-nitro-1H-pyrazole towards high-energy and insensitive energetic materials
Source: Royal Society of Chemistry journal article supplement (doi:10.1039/d2ta01146h), 2022-01-01
Supplement: d2ta01146h1.pdf [file d2ta01146h1.pdf]

## Supporting Information

### Radical-mediated C–N Bond Activation in 3,5-Diamino-4-nitro-1*H*-pyrazole towards High-energy and Insensitive Energetic Materials

Zhiwei Zeng,<sup>a</sup> Yuji Liu,<sup>\*a</sup> Wei Huang,<sup>a</sup> Jean'ne M. Shreeve<sup>\*b</sup> and Yongxing Tang<sup>\*a</sup>

<sup>a</sup>School of Chemistry and Chemical Engineering, Nanjing University of Science and Technology, Nanjing 210094, China.

<sup>b</sup>Department of Chemistry, University of Idaho, Moscow, Idaho 83844-2343, USA.

# Table of Contents

|                                        |     |
|----------------------------------------|-----|
| 1. General Methods                     | S3  |
| 2. Crystallographic Data               | S4  |
| 3. Computational Details               | S16 |
| 4. Geometries for Optimized Structures | S18 |
| 5. NMR Spectra                         | S23 |
| 6. DSC Plots                           | S26 |
| 7. ESR Measurement                     | S28 |
| 8. References                          | S29 |

## 1. General Methods

Chemical reagents were purchased from Bide Pharm (*N*-bromosuccinimide, 2,6-di-*tert*-butyl-4-methylphenol) in analytical grade and were used without further purification.  $^1\text{H}$  and  $^{13}\text{C}$  NMR spectra were recorded on a Bruker AVANCE III 500 MHz nuclear magnetic resonance spectrometer.  $\text{DMSO-}d_6$  was used as solvent and locking solvent. The working frequencies for  $^1\text{H}$  and  $^{13}\text{C}$  are 500.03 MHz and 125.75 MHz, respectively. Decomposition temperature was obtained on a TA Instruments DSC25 differential scanning calorimeter at a heating rate of  $5\text{ }^\circ\text{C min}^{-1}$ . Infrared spectra (IR) were recorded on a PerkinElmer Spectrum BX FT-IR instrument equipped with an ATR unit at  $25\text{ }^\circ\text{C}$ . Elemental analyses of C/H/N were performed on a Vario EL III Analyzer. Impact and friction sensitivities were measured with a BAM fallhammer and friction tester. X-ray intensity data were collected on a Bruker D8 VENTURE PHOTON II system equipped with an Incoatecius 3.0 Microfocus sealed tube. The structure was solved and refined using Bruker SHELXTL Software Package. The data were refined against  $F^2$ . All non-hydrogen atoms were refined anisotropically. Hydrogen atoms were fixed to their parent atoms using a riding model and refined isotropically.

## 2. Crystallographic Data

**Table S1.** Crystal data and structure refinement for 2·DMSO.

|                                                              |                                                                              |
|--------------------------------------------------------------|------------------------------------------------------------------------------|
| CCDC number                                                  | 2142354                                                                      |
| Empirical formula                                            | C <sub>8</sub> H <sub>12</sub> N <sub>8</sub> O <sub>5</sub> S               |
| Formula weight                                               | 332.32                                                                       |
| Temperature/K                                                | 296.15                                                                       |
| Crystal system                                               | triclinic                                                                    |
| Space group                                                  | <i>P</i> $\bar{1}$                                                           |
| <i>a</i> /Å                                                  | 6.973(19)                                                                    |
| <i>b</i> /Å                                                  | 10.12(3)                                                                     |
| <i>c</i> /Å                                                  | 11.10(3)                                                                     |
| $\alpha$ /°                                                  | 70.53(3)                                                                     |
| $\beta$ /°                                                   | 79.60(3)                                                                     |
| $\gamma$ /°                                                  | 75.78(3)                                                                     |
| Volume/Å <sup>3</sup>                                        | 711(3)                                                                       |
| <i>Z</i>                                                     | 2                                                                            |
| $\rho_{\text{calc}}$ /g cm <sup>-3</sup>                     | 1.552                                                                        |
| $\mu$ /mm <sup>-1</sup>                                      | 0.267                                                                        |
| <i>F</i> (000)                                               | 344.0                                                                        |
| Crystal size/mm <sup>3</sup>                                 | 0.160 × 0.150 × 0.130                                                        |
| Radiation                                                    | MoK $\alpha$ ( $\lambda$ = 0.71073)                                          |
| 2 $\Theta$ range for data collection/°                       | 3.916 to 49.992                                                              |
| Index ranges                                                 | -8 ≤ <i>h</i> ≤ 8, -12 ≤ <i>k</i> ≤ 11, -13 ≤ <i>l</i> ≤ 13                  |
| Reflections collected                                        | 5101                                                                         |
| Independent reflections                                      | 2477 [ <i>R</i> <sub>int</sub> = 0.0625, <i>R</i> <sub>sigma</sub> = 0.1057] |
| Data/restraints/parameters                                   | 2477/1/205                                                                   |
| Goodness-of-fit on <i>F</i> <sup>2</sup>                     | 1.076                                                                        |
| Final <i>R</i> indexes [ <i>I</i> ≥ 2 $\sigma$ ( <i>I</i> )] | <i>R</i> <sub>1</sub> = 0.0688, <i>wR</i> <sub>2</sub> = 0.1397              |
| Final <i>R</i> indexes [all data]                            | <i>R</i> <sub>1</sub> = 0.1361, <i>wR</i> <sub>2</sub> = 0.1626              |
| Largest diff. peak/hole / e Å <sup>-3</sup>                  | 0.29/-0.33                                                                   |

**Table S2.** Bond lengths for 2·DMSO.

| Atom | Atom | Length/Å | Atom | Atom | Length/Å |
|------|------|----------|------|------|----------|
| S1   | O1   | 1.531(6) | C3   | N5   | 1.402(6) |
| S1   | C7   | 1.781(6) | O3   | N4   | 1.248(5) |
| S1   | C8   | 1.792(6) | C4   | N5   | 1.347(7) |
| N1   | C1   | 1.348(6) | C4   | C5   | 1.442(7) |
| C1   | N2   | 1.349(6) | C4   | N8   | 1.330(6) |
| C1   | C2   | 1.423(7) | C5   | N6   | 1.401(6) |
| O2   | N4   | 1.240(5) | C5   | C6   | 1.417(7) |
| N2   | N3   | 1.407(6) | O5   | N6   | 1.255(6) |
| C2   | C3   | 1.419(7) | N6   | O6   | 1.252(5) |
| C2   | N4   | 1.400(6) | C6   | N7   | 1.160(6) |
| C3   | N3   | 1.322(6) |      |      |          |

**Table S3.** Bond angles for 2·DMSO.

| Atom | Atom | Atom | Angle/°  |
|------|------|------|----------|
| O1   | S1   | C7   | 105.7(3) |
| O1   | S1   | C8   | 106.5(3) |
| C7   | S1   | C8   | 99.1(3)  |
| N1   | C1   | N2   | 124.8(5) |
| N1   | C1   | C2   | 130.1(4) |
| N2   | C1   | C2   | 105.1(4) |
| C1   | N2   | N3   | 113.1(4) |
| C3   | C2   | C1   | 105.5(4) |
| N4   | C2   | C1   | 126.7(4) |
| N4   | C2   | C3   | 127.8(4) |
| N3   | C3   | C2   | 112.0(4) |
| N3   | C3   | N5   | 123.0(5) |
| N5   | C3   | C2   | 125.0(4) |
| C3   | N3   | N2   | 104.3(4) |
| O2   | N4   | C2   | 118.6(4) |
| O2   | N4   | O3   | 121.6(4) |
| O3   | N4   | C2   | 119.8(4) |
| N5   | C4   | C5   | 119.8(4) |
| N8   | C4   | N5   | 119.8(4) |
| N8   | C4   | C5   | 120.4(4) |
| C4   | N5   | C3   | 127.9(4) |
| N6   | C5   | C4   | 124.5(4) |
| N6   | C5   | C6   | 114.2(4) |
| C6   | C5   | C4   | 121.3(4) |
| O5   | N6   | C5   | 120.9(4) |

| Atom | Atom | Atom | Angle/°  |
|------|------|------|----------|
| O6   | N6   | C5   | 117.7(5) |
| O6   | N6   | O5   | 121.4(4) |
| N7   | C6   | C5   | 178.4(5) |

**Table S4.** Torsion angles for 2·DMSO.

| Atom | Atom | Atom | Atom | Angle/°   |
|------|------|------|------|-----------|
| N1   | C1   | N2   | N3   | 178.2(4)  |
| N1   | C1   | C2   | C3   | -178.7(5) |
| N1   | C1   | C2   | N4   | 0.6(9)    |
| C1   | N2   | N3   | C3   | 0.8(5)    |
| C1   | C2   | C3   | N3   | 0.9(6)    |
| C1   | C2   | C3   | N5   | -177.6(4) |
| C1   | C2   | N4   | O2   | 1.2(7)    |
| C1   | C2   | N4   | O3   | -179.4(5) |
| N2   | C1   | C2   | C3   | -0.4(5)   |
| N2   | C1   | C2   | N4   | 178.9(4)  |
| C2   | C1   | N2   | N3   | -0.2(5)   |
| C2   | C3   | N3   | N2   | -1.0(5)   |
| C2   | C3   | N5   | C4   | 178.3(5)  |
| C3   | C2   | N4   | O2   | -179.6(5) |
| C3   | C2   | N4   | O3   | -0.1(7)   |
| N3   | C3   | N5   | C4   | -0.1(8)   |
| N4   | C2   | C3   | N3   | -178.4(4) |
| N4   | C2   | C3   | N5   | 3.0(8)    |
| C4   | C5   | N6   | O5   | 1.1(8)    |
| C4   | C5   | N6   | O6   | 179.2(5)  |
| N5   | C3   | N3   | N2   | 177.6(4)  |
| N5   | C4   | C5   | N6   | 4.0(7)    |
| N5   | C4   | C5   | C6   | -178.2(5) |
| C5   | C4   | N5   | C3   | -178.9(4) |
| C6   | C5   | N6   | O5   | -176.8(5) |
| C6   | C5   | N6   | O6   | 1.3(7)    |
| N8   | C4   | N5   | C3   | 1.3(8)    |
| N8   | C4   | C5   | N6   | -176.2(4) |
| N8   | C4   | C5   | C6   | 1.6(7)    |

**Table S5.** Hydrogen bonds for 2·DMSO.

| D  | H   | A               | d(D-H)/Å | d(H-A)/Å | d(D-A)/Å  | D-H-A/° |
|----|-----|-----------------|----------|----------|-----------|---------|
| N1 | H1A | O1 <sup>1</sup> | 0.86     | 2.30     | 2.978(9)  | 136.3   |
| N2 | H2  | O1              | 0.86     | 2.01     | 2.820(8)  | 156.8   |
| N5 | H5  | O3              | 0.84(5)  | 2.18(5)  | 2.834(8)  | 134(4)  |
| N5 | H5  | O5              | 0.84(5)  | 2.01(5)  | 2.637(9)  | 131(4)  |
| C7 | H7C | O6 <sup>2</sup> | 0.96     | 2.61     | 3.292(10) | 127.9   |
| C8 | H8E | O6 <sup>3</sup> | 0.96     | 2.50     | 3.215(9)  | 131.7   |
| N8 | H8A | N3              | 0.86     | 2.06     | 2.717(8)  | 133.0   |
| N8 | H8B | N7 <sup>4</sup> | 0.86     | 2.14     | 2.980(9)  | 165.2   |

<sup>1</sup>-X,1-Y,-Z; <sup>2</sup>-1+X,1+Y,-1+Z; <sup>3</sup>+X,1+Y,-1+Z; <sup>4</sup>2-X,-Y,1-Z

**Table S6.** Crystal data and structure refinement for **3**.

|                                                |                                                               |
|------------------------------------------------|---------------------------------------------------------------|
| CCDC number                                    | 2142355                                                       |
| Empirical formula                              | C <sub>6</sub> H <sub>6</sub> N <sub>8</sub> O <sub>4</sub>   |
| Formula weight                                 | 254.19                                                        |
| Temperature/K                                  | 307.00                                                        |
| Crystal system                                 | monoclinic                                                    |
| Space group                                    | <i>P</i> 2 <sub>1</sub> / <i>n</i>                            |
| <i>a</i> /Å                                    | 6.484(9)                                                      |
| <i>b</i> /Å                                    | 7.966(11)                                                     |
| <i>c</i> /Å                                    | 18.00(4)                                                      |
| <i>α</i> /°                                    | 90                                                            |
| <i>β</i> /°                                    | 91.59(4)                                                      |
| <i>γ</i> /°                                    | 90                                                            |
| Volume/Å <sup>3</sup>                          | 929(3)                                                        |
| <i>Z</i>                                       | 4                                                             |
| $\rho_{\text{calc}}/\text{g cm}^{-3}$          | 1.816                                                         |
| $\mu/\text{mm}^{-1}$                           | 1.353                                                         |
| <i>F</i> (000)                                 | 520.0                                                         |
| Crystal size/mm <sup>3</sup>                   | 0.15 × 0.02 × 0.01                                            |
| Radiation                                      | CuK $\alpha$ ( $\lambda = 1.54178$ )                          |
| 2 $\Theta$ range for data collection/°         | 9.828 to 133.334                                              |
| Index ranges                                   | $-7 \leq h \leq 7, -9 \leq k \leq 9, -21 \leq l \leq 21$      |
| Reflections collected                          | 6115                                                          |
| Independent reflections                        | 1623 [ $R_{\text{int}} = 0.1203, R_{\text{sigma}} = 0.0910$ ] |
| Data/restraints/parameters                     | 1623/5/169                                                    |
| Goodness-of-fit on <i>F</i> <sup>2</sup>       | 1.016                                                         |
| Final <i>R</i> indexes [ $I \geq 2\sigma(I)$ ] | $R_1 = 0.0666, wR_2 = 0.1561$                                 |
| Final <i>R</i> indexes [all data]              | $R_1 = 0.1494, wR_2 = 0.2217$                                 |
| Largest diff. peak/hole / e Å <sup>-3</sup>    | 0.32/−0.31                                                    |



**Table S7.** Bond lengths for **3**.

| Atom | Atom | Length/Å | Atom | Atom | Length/Å |
|------|------|----------|------|------|----------|
| O1   | N3   | 1.244(6) | N3   | C3   | 1.407(8) |
| C1   | C3   | 1.382(8) | O4   | N5   | 1.242(6) |
| C1   | N6   | 1.372(7) | C4   | C5   | 1.442(7) |
| C1   | N8   | 1.332(7) | C4   | N8   | 1.360(8) |
| O2   | N3   | 1.238(6) | N5   | C5   | 1.438(8) |
| N2   | C4   | 1.324(7) | C5   | C6   | 1.411(8) |
| C2   | C3   | 1.438(8) | N6   | C6   | 1.390(8) |
| C2   | N7   | 1.352(7) | N6   | N7   | 1.397(6) |
| C2   | N9   | 1.338(8) | C6   | N10  | 1.324(6) |
| O3   | N5   | 1.233(6) |      |      |          |

**Table S8.** Bond angles for **3**.

| Atom | Atom | Atom | Angle/°  |
|------|------|------|----------|
| N6   | C1   | C3   | 104.0(5) |
| N8   | C1   | C3   | 132.8(5) |
| N8   | C1   | N6   | 123.1(5) |
| N7   | C2   | C3   | 110.0(5) |
| N9   | C2   | C3   | 127.1(6) |
| N9   | C2   | N7   | 122.8(5) |
| O1   | N3   | C3   | 120.2(5) |
| O2   | N3   | O1   | 121.5(5) |
| O2   | N3   | C3   | 118.3(5) |
| C1   | C3   | C2   | 108.0(5) |
| C1   | C3   | N3   | 128.1(5) |
| N3   | C3   | C2   | 123.9(6) |
| N2   | C4   | C5   | 122.5(6) |
| N2   | C4   | N8   | 115.8(5) |
| N8   | C4   | C5   | 121.7(5) |
| O3   | N5   | O4   | 120.4(5) |
| O3   | N5   | C5   | 120.5(5) |
| O4   | N5   | C5   | 119.0(5) |
| N5   | C5   | C4   | 121.2(5) |
| C6   | C5   | C4   | 120.0(5) |
| C6   | C5   | N5   | 118.8(5) |
| C1   | N6   | C6   | 123.4(5) |
| C1   | N6   | N7   | 114.4(5) |
| C6   | N6   | N7   | 122.2(4) |
| N6   | C6   | C5   | 114.4(4) |
| N10  | C6   | C5   | 129.0(6) |
| N10  | C6   | N6   | 116.6(5) |

| Atom | Atom | Atom | Angle/°  |
|------|------|------|----------|
| C2   | N7   | N6   | 103.5(4) |
| C1   | N8   | C4   | 117.3(4) |

**Table S9.** Torsion angles for **3**.

| Atom | Atom | Atom | Atom | Angle/°   |
|------|------|------|------|-----------|
| O1   | N3   | C3   | C1   | -175.4(6) |
| O1   | N3   | C3   | C2   | 4.7(9)    |
| C1   | N6   | C6   | C5   | -2.4(7)   |
| C1   | N6   | C6   | N10  | -179.8(5) |
| C1   | N6   | N7   | C2   | 0.3(6)    |
| O2   | N3   | C3   | C1   | 5.6(9)    |
| O2   | N3   | C3   | C2   | -174.2(5) |
| N2   | C4   | C5   | N5   | -2.8(9)   |
| N2   | C4   | C5   | C6   | 177.2(6)  |
| N2   | C4   | N8   | C1   | -179.7(5) |
| O3   | N5   | C5   | C4   | -4.3(8)   |
| O3   | N5   | C5   | C6   | 175.7(5)  |
| C3   | C1   | N6   | C6   | -179.0(5) |
| C3   | C1   | N6   | N7   | 0.0(6)    |
| C3   | C1   | N8   | C4   | 178.8(6)  |
| C3   | C2   | N7   | N6   | -0.5(6)   |
| O4   | N5   | C5   | C4   | 179.1(5)  |
| O4   | N5   | C5   | C6   | -0.9(8)   |
| C4   | C5   | C6   | N6   | 4.7(7)    |
| C4   | C5   | C6   | N10  | -178.3(5) |
| N5   | C5   | C6   | N6   | -175.3(5) |
| N5   | C5   | C6   | N10  | 1.7(9)    |
| C5   | C4   | N8   | C1   | 2.1(8)    |
| N6   | C1   | C3   | C2   | -0.4(6)   |
| N6   | C1   | C3   | N3   | 179.7(5)  |
| N6   | C1   | N8   | C4   | 0.3(8)    |
| C6   | N6   | N7   | C2   | 179.4(5)  |
| N7   | C2   | C3   | C1   | 0.6(7)    |
| N7   | C2   | C3   | N3   | -179.5(5) |
| N7   | N6   | C6   | C5   | 178.6(4)  |
| N7   | N6   | C6   | N10  | 1.2(8)    |
| N8   | C1   | C3   | C2   | -179.1(6) |
| N8   | C1   | C3   | N3   | 1.0(11)   |
| N8   | C1   | N6   | C6   | -0.1(8)   |
| N8   | C1   | N6   | N7   | 178.9(5)  |
| N8   | C4   | C5   | N5   | 175.2(5)  |
| N8   | C4   | C5   | C6   | -4.8(8)   |

| Atom | Atom | Atom | Atom | Angle/°   |
|------|------|------|------|-----------|
| N9   | C2   | C3   | C1   | 178.8(6)  |
| N9   | C2   | C3   | N3   | -1.3(10)  |
| N9   | C2   | N7   | N6   | -178.9(5) |

**Table S10.** Hydrogen bonds for **3**.

| D   | H    | A               | d(D-H)/Å  | d(H-A)/Å | d(D-A)/Å  | D-H-A/° |
|-----|------|-----------------|-----------|----------|-----------|---------|
| N2  | H2A  | O3              | 0.903(18) | 2.01(4)  | 2.612(8)  | 123(4)  |
| N2  | H2B  | N8 <sup>1</sup> | 0.894(18) | 2.27(2)  | 3.166(7)  | 177(6)  |
| N9  | H9A  | N7 <sup>2</sup> | 0.86      | 2.43     | 3.271(7)  | 165.7   |
| N9  | H9B  | O1              | 0.86      | 2.20     | 2.774(7)  | 124.0   |
| N9  | H9B  | O4 <sup>3</sup> | 0.86      | 2.52     | 3.094(10) | 125.4   |
| N10 | H10A | O4 <sup>4</sup> | 0.86      | 2.49     | 3.088(7)  | 127.7   |
| N10 | H10B | O1 <sup>5</sup> | 0.86      | 2.55     | 3.226(8)  | 136.2   |
| N10 | H10B | O2 <sup>5</sup> | 0.86      | 2.52     | 3.267(10) | 146.4   |
| N10 | H10B | O4              | 0.86      | 2.02     | 2.610(8)  | 124.5   |

<sup>1</sup>2-X,1-Y,1-Z; <sup>2</sup>-X,-Y,1-Z; <sup>3</sup>-1/2+X,1/2-Y,1/2+Z; <sup>4</sup>1/2-X,-1/2+Y,1/2-Z; <sup>5</sup>-1/2+X,1/2-Y,-1/2+Z

**Table S11.** Crystal data and structure refinement for 4·CH<sub>3</sub>OH.

|                                                              |                                                                              |
|--------------------------------------------------------------|------------------------------------------------------------------------------|
| CCDC number                                                  | 2142356                                                                      |
| Empirical formula                                            | C <sub>7</sub> H <sub>8</sub> N <sub>8</sub> O <sub>7</sub>                  |
| Formula weight                                               | 316.21                                                                       |
| Temperature/K                                                | 296.15                                                                       |
| Crystal system                                               | monoclinic                                                                   |
| Space group                                                  | <i>P</i> 2 <sub>1</sub> / <i>n</i>                                           |
| <i>a</i> /Å                                                  | 10.849(5)                                                                    |
| <i>b</i> /Å                                                  | 9.328(4)                                                                     |
| <i>c</i> /Å                                                  | 12.780(6)                                                                    |
| <i>α</i> /°                                                  | 90                                                                           |
| <i>β</i> /°                                                  | 110.352(7)                                                                   |
| <i>γ</i> /°                                                  | 90                                                                           |
| Volume/Å <sup>3</sup>                                        | 1212.6(9)                                                                    |
| <i>Z</i>                                                     | 4                                                                            |
| $\rho_{\text{calc}}/\text{g cm}^{-3}$                        | 1.732                                                                        |
| $\mu/\text{mm}^{-1}$                                         | 0.155                                                                        |
| <i>F</i> (000)                                               | 648.0                                                                        |
| Crystal size/mm <sup>3</sup>                                 | 0.16 × 0.15 × 0.12                                                           |
| Radiation                                                    | MoK $\alpha$ ( $\lambda$ = 0.71073)                                          |
| 2 $\Theta$ range for data collection/°                       | 4.256 to 54.968                                                              |
| Index ranges                                                 | −13 ≤ <i>h</i> ≤ 14, −12 ≤ <i>k</i> ≤ 11, −16 ≤ <i>l</i> ≤ 16                |
| Reflections collected                                        | 7211                                                                         |
| Independent reflections                                      | 2759 [ <i>R</i> <sub>int</sub> = 0.0590, <i>R</i> <sub>sigma</sub> = 0.0707] |
| Data/restraints/parameters                                   | 2759/0/200                                                                   |
| Goodness-of-fit on <i>F</i> <sup>2</sup>                     | 0.990                                                                        |
| Final <i>R</i> indexes [ <i>I</i> ≥ 2 $\sigma$ ( <i>I</i> )] | <i>R</i> <sub>1</sub> = 0.0580, <i>wR</i> <sub>2</sub> = 0.1578              |
| Final <i>R</i> indexes [all data]                            | <i>R</i> <sub>1</sub> = 0.1010, <i>wR</i> <sub>2</sub> = 0.1949              |
| Largest diff. peak/hole / e Å <sup>−3</sup>                  | 0.27/−0.33                                                                   |

**Table S12.** Bond lengths for 4·CH<sub>3</sub>OH.

| Atom | Atom | Length/Å | Atom | Atom | Length/Å |
|------|------|----------|------|------|----------|
| O1   | N4   | 1.211(3) | N3   | C3   | 1.315(3) |
| O2   | N4   | 1.215(4) | N3   | C4   | 1.361(4) |
| O3   | N5   | 1.220(3) | N4   | C1   | 1.465(3) |
| O4   | N5   | 1.235(3) | N5   | C2   | 1.399(3) |
| O5   | C7   | 1.405(4) | N6   | C4   | 1.316(3) |
| O6   | N7   | 1.226(3) | N7   | C5   | 1.414(4) |
| O7   | N7   | 1.250(3) | N8   | C6   | 1.299(3) |
| N1   | N2   | 1.377(3) | C1   | C2   | 1.403(4) |
| N1   | C1   | 1.308(4) | C2   | C3   | 1.410(4) |
| N2   | C3   | 1.380(3) | C4   | C5   | 1.435(4) |
| N2   | C6   | 1.366(3) | C5   | C6   | 1.408(4) |

**Table S13.** Bond angles for 4·CH<sub>3</sub>OH.

| Atom | Atom | Atom | Angle/°  |
|------|------|------|----------|
| C1   | N1   | N2   | 102.2(2) |
| N1   | N2   | C3   | 114.3(2) |
| C6   | N2   | N1   | 121.9(2) |
| C6   | N2   | C3   | 123.8(2) |
| C3   | N3   | C4   | 116.5(2) |
| O1   | N4   | O2   | 126.2(3) |
| O1   | N4   | C1   | 117.8(3) |
| O2   | N4   | C1   | 115.9(3) |
| O3   | N5   | O4   | 124.5(2) |
| O3   | N5   | C2   | 118.2(3) |
| O4   | N5   | C2   | 117.3(2) |
| O6   | N7   | O7   | 120.8(2) |
| O6   | N7   | C5   | 120.7(3) |
| O7   | N7   | C5   | 118.5(2) |
| N1   | C1   | N4   | 116.6(2) |
| N1   | C1   | C2   | 115.2(2) |
| C2   | C1   | N4   | 128.0(3) |
| N5   | C2   | C1   | 128.5(3) |
| N5   | C2   | C3   | 127.0(2) |
| C1   | C2   | C3   | 104.3(2) |
| N2   | C3   | C2   | 104.0(2) |
| N3   | C3   | N2   | 123.6(2) |
| N3   | C3   | C2   | 132.4(2) |
| N3   | C4   | C5   | 121.7(2) |
| N6   | C4   | N3   | 113.5(2) |
| N6   | C4   | C5   | 124.8(3) |

| Atom | Atom | Atom | Angle/°  |
|------|------|------|----------|
| N7   | C5   | C4   | 120.7(2) |
| C6   | C5   | N7   | 118.7(2) |
| C6   | C5   | C4   | 120.7(2) |
| N2   | C6   | C5   | 113.7(2) |
| N8   | C6   | N2   | 115.6(2) |
| N8   | C6   | C5   | 130.7(3) |

**Table S14.** Torsion angles for 4·CH<sub>3</sub>OH.

| Atom | Atom | Atom | Atom | Angle/°   |
|------|------|------|------|-----------|
| O1   | N4   | C1   | N1   | -62.2(4)  |
| O1   | N4   | C1   | C2   | 123.1(4)  |
| O2   | N4   | C1   | N1   | 115.8(3)  |
| O2   | N4   | C1   | C2   | -59.0(4)  |
| O3   | N5   | C2   | C1   | -3.2(5)   |
| O3   | N5   | C2   | C3   | 170.1(3)  |
| O4   | N5   | C2   | C1   | 178.2(3)  |
| O4   | N5   | C2   | C3   | -8.6(4)   |
| O6   | N7   | C5   | C4   | 5.4(4)    |
| O6   | N7   | C5   | C6   | -174.4(3) |
| O7   | N7   | C5   | C4   | -174.5(3) |
| O7   | N7   | C5   | C6   | 5.6(4)    |
| N1   | N2   | C3   | N3   | -179.9(3) |
| N1   | N2   | C3   | C2   | -0.2(3)   |
| N1   | N2   | C6   | N8   | 1.8(4)    |
| N1   | N2   | C6   | C5   | -178.9(2) |
| N1   | C1   | C2   | N5   | 173.9(3)  |
| N1   | C1   | C2   | C3   | -0.5(3)   |
| N2   | N1   | C1   | N4   | -175.1(2) |
| N2   | N1   | C1   | C2   | 0.4(3)    |
| N3   | C4   | C5   | N7   | 179.6(3)  |
| N3   | C4   | C5   | C6   | -0.5(4)   |
| N4   | C1   | C2   | N5   | -11.2(5)  |
| N4   | C1   | C2   | C3   | 174.3(3)  |
| N5   | C2   | C3   | N2   | -174.2(3) |
| N5   | C2   | C3   | N3   | 5.5(5)    |
| N6   | C4   | C5   | N7   | 0.7(4)    |
| N6   | C4   | C5   | C6   | -179.4(3) |
| N7   | C5   | C6   | N2   | -179.7(2) |
| N7   | C5   | C6   | N8   | -0.5(5)   |
| C1   | N1   | N2   | C3   | -0.1(3)   |
| C1   | N1   | N2   | C6   | 177.9(2)  |
| C1   | C2   | C3   | N2   | 0.4(3)    |

| Atom | Atom | Atom | Atom | Angle/°   |
|------|------|------|------|-----------|
| C1   | C2   | C3   | N3   | -179.9(3) |
| C3   | N2   | C6   | N8   | 179.5(3)  |
| C3   | N2   | C6   | C5   | -1.2(4)   |
| C3   | N3   | C4   | N6   | -179.6(3) |
| C3   | N3   | C4   | C5   | 1.3(4)    |
| C4   | N3   | C3   | N2   | -2.1(4)   |
| C4   | N3   | C3   | C2   | 178.2(3)  |
| C4   | C5   | C6   | N2   | 0.4(4)    |
| C4   | C5   | C6   | N8   | 179.6(3)  |
| C6   | N2   | C3   | N3   | 2.2(4)    |
| C6   | N2   | C3   | C2   | -178.1(2) |

**Table S15.** Hydrogen bonds for 4·CH<sub>3</sub>OH.

| D  | H   | A               | d(D-H)/Å | d(H-A)/Å | d(D-A)/Å | D-H-A/° |
|----|-----|-----------------|----------|----------|----------|---------|
| N6 | H6A | O6              | 0.91     | 2.03     | 2.623(4) | 121.6   |
| N6 | H6B | O5              | 1.00     | 1.95     | 2.937(4) | 168.4   |
| N8 | H8A | O2 <sup>1</sup> | 0.93     | 2.21     | 3.117(3) | 166.3   |
| N8 | H8B | O4 <sup>2</sup> | 0.87     | 2.27     | 3.002(3) | 142.4   |
| N8 | H8B | O7              | 0.87     | 1.99     | 2.612(3) | 128.0   |
| O5 | H5  | O7 <sup>3</sup> | 1.02     | 2.12     | 3.097(3) | 158.3   |

<sup>1</sup>3/2-X,-1/2+Y,1/2-Z; <sup>2</sup>+X,-1+Y,+Z; <sup>3</sup>+X,1+Y,+Z

### 3. Computational Details

DFT calculations were accomplished with Gaussian 09 Rev. D.01 suite of package<sup>1</sup> and ORCA 5.0.2.<sup>2</sup> All species in the mechanism study were optimized to either minimum or transition state with  $\omega$ B97X-D functional and 6-311G(d,p) basis set. Frequency calculations at the same level of theory were carried out to further characterize each species and to obtain the thermodynamic corrections to Gibbs free energy. Intrinsic reaction coordinate (IRC) was calculated to confirm the connection between the transition state and the corresponding reactant/product.<sup>3</sup> Single-point energies were calculated at DLPNO-CCSD(T1)/cc-pVTZ level with cc-pVTZ/C as an auxiliary basis set. The Gibbs free energies were calculated in the gas phase at 298.15 K, 1 atm.

Gas phase heats of formation were calculated based on an isodesmic reaction (Scheme S1 and Scheme S2). The enthalpy of reaction was obtained by combining the MP2/6-311++G\*\* energy difference for the reactions, the scaled zero-point energies (ZPE), values of thermal correction (HT), and other thermal factors. The solid state heats of formation were calculated with Trouton's rule according to equation 1 ( $T$  represents either melting point or decomposition temperature when no melting occurs prior to decomposition).<sup>4</sup>

$$\Delta H_{Sub} = 188/\text{J mol}^{-1}\text{K}^{-1} \times T \quad (1)$$

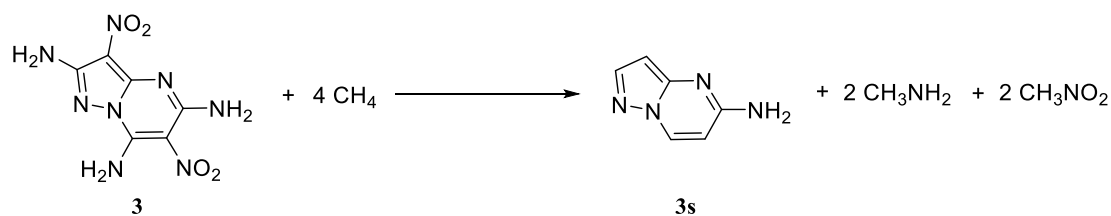

**Scheme S1.** Isodesmic reaction for **3**.



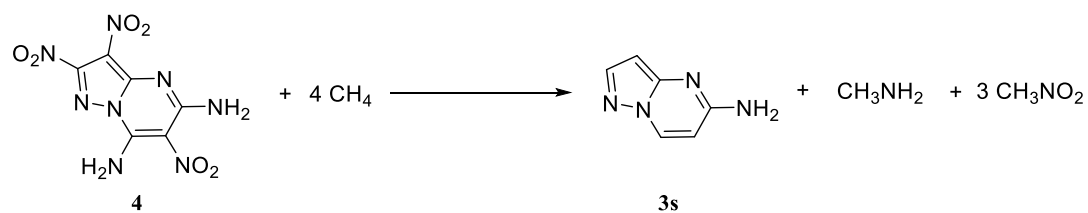

**Scheme S2.** Isodesmic reaction for **4**.

**Table S16.** Calculated zero-point energy (*ZPE*), values of the correction (*H<sub>r</sub>*), total energy (*E<sub>0</sub>*) and heats of formation (*HOF*) in gas state.

| Species                         | <i>ZPE</i> | <i>H<sub>r</sub></i> | <i>E<sub>0</sub></i> | corrected <i>E<sub>0</sub></i> | <i>HOF</i> (kJ mol <sup>-1</sup> ) |
|---------------------------------|------------|----------------------|----------------------|--------------------------------|------------------------------------|
| <b>3</b>                        | 0.159908   | 0.176342             | -968.7802711         | -968.610325                    | 221.31                             |
| <b>4</b>                        | 0.146538   | 0.163865             | -1117.629137         | -1117.47113                    | 265.91                             |
| <b>3s</b>                       | 0.121701   | 0.129571             | -450.0928666         | -449.968164                    | 292.68 <sup>a</sup>                |
| CH <sub>4</sub>                 | 0.044793   | 0.048605             | -40.3796224          | -40.332810                     | -74.6 <sup>5</sup>                 |
| CH <sub>3</sub> NH <sub>2</sub> | 0.064030   | 0.068401             | -95.5938410          | -95.528000                     | -23.0 <sup>5</sup>                 |
| CH <sub>3</sub> NO <sub>2</sub> | 0.049840   | 0.055138             | -244.4784821         | -244.42534                     | -74.3 <sup>5</sup>                 |

<sup>a</sup> Data obtained from G2.

## 4. Geometries for Optimized Structures

**Table S17.** Geometries for **1**.

| Atom | x         | y         | z         |
|------|-----------|-----------|-----------|
| N    | 0.269180  | -2.441129 | 0.069622  |
| H    | 0.874002  | -3.136945 | -0.331522 |
| H    | -0.726838 | -2.572688 | -0.042149 |
| C    | 0.651790  | -1.142824 | 0.014904  |
| C    | -0.129334 | 0.019027  | 0.055465  |
| N    | -1.524462 | 0.060426  | -0.000717 |
| O    | -2.138938 | -1.007361 | 0.002349  |
| O    | -2.074278 | 1.154425  | -0.055664 |
| C    | 0.796685  | 1.111514  | 0.021555  |
| N    | 0.478830  | 2.433096  | 0.086474  |
| H    | 1.194802  | 3.076818  | -0.203668 |
| H    | -0.477349 | 2.661031  | -0.134218 |
| N    | 2.032140  | 0.672027  | -0.033183 |
| N    | 1.912243  | -0.706321 | -0.037385 |
| H    | 2.750749  | -1.257722 | -0.007143 |

**Table S18.** Geometries for **A**.

| Atom | x         | y         | z         |
|------|-----------|-----------|-----------|
| N    | -0.452087 | 2.396797  | 0.000529  |
| H    | -1.202396 | 3.066669  | -0.000906 |
| H    | 0.515940  | 2.679160  | 0.000087  |
| C    | -0.741554 | 1.101938  | 0.000235  |
| C    | 0.131171  | 0.000297  | 0.000651  |
| N    | 1.524818  | 0.001768  | 0.000000  |
| O    | 2.101450  | 1.086645  | -0.000661 |
| O    | 2.103621  | -1.081861 | 0.000071  |
| C    | -0.739009 | -1.103611 | 0.000047  |
| N    | -0.446122 | -2.397725 | 0.000353  |
| H    | -1.194884 | -3.069519 | -0.001555 |
| H    | 0.522356  | -2.678133 | 0.000348  |
| N    | -2.040017 | -0.660135 | -0.000452 |
| N    | -2.041626 | 0.655268  | -0.000266 |

**Table S19.** Geometries for **B**.

| Atom | <i>x</i>  | <i>y</i>  | <i>z</i>  |
|------|-----------|-----------|-----------|
| N    | 0.251095  | 2.347377  | -0.000005 |
| H    | -0.310390 | 3.182298  | 0.000062  |
| H    | 1.260548  | 2.375376  | 0.000264  |
| C    | -0.341645 | 1.168767  | -0.000084 |
| C    | 0.127114  | -0.109979 | -0.000041 |
| N    | 1.497699  | -0.462586 | -0.000027 |
| O    | 2.298934  | 0.476394  | 0.000462  |
| O    | 1.807373  | -1.631636 | -0.000571 |
| C    | -1.050296 | -0.959480 | 0.000102  |
| N    | -1.196866 | -2.209208 | 0.000404  |
| H    | -2.195432 | -2.425247 | 0.000431  |
| N    | -2.191988 | -0.031433 | -0.000131 |
| N    | -1.790830 | 1.143515  | -0.000204 |

**Table S20.** Geometries for **IM-1**.

| Atom | <i>x</i>  | <i>y</i>  | <i>z</i>  |
|------|-----------|-----------|-----------|
| N    | -0.302884 | 2.313934  | -0.000002 |
| H    | -1.034672 | 3.004710  | 0.000016  |
| H    | 0.674304  | 2.568338  | -0.000518 |
| C    | -0.619016 | 1.033084  | 0.000162  |
| C    | 0.131292  | -0.105756 | -0.000092 |
| N    | 1.542766  | -0.163429 | 0.000039  |
| O    | 2.129238  | 0.919842  | -0.000709 |
| O    | 2.082138  | -1.247856 | 0.000963  |
| C    | -0.814092 | -1.203653 | -0.000201 |
| N    | -0.715024 | -2.448440 | -0.000688 |
| N    | -2.155724 | -0.559780 | 0.000080  |
| N    | -2.014812 | 0.673290  | 0.000466  |

**Table S21.** Geometries for **TS-1**.

| Atom | <i>x</i>  | <i>y</i>  | <i>z</i>  |
|------|-----------|-----------|-----------|
| O    | 2.127998  | -1.196129 | 0.000070  |
| O    | 2.092650  | 0.967839  | -0.000070 |
| N    | -0.692615 | -2.515124 | -0.000026 |
| N    | -2.276846 | -0.486436 | -0.000004 |
| N    | -2.031320 | 0.693898  | 0.000009  |
| N    | 1.546396  | -0.137504 | -0.000001 |
| C    | -0.696869 | -1.313492 | -0.000014 |
| C    | -0.623580 | 1.010862  | 0.000008  |
| C    | 0.123202  | -0.130938 | -0.000006 |
| N    | -0.295269 | 2.289615  | 0.000033  |
| H    | 0.686117  | 2.529307  | -0.000017 |
| H    | -1.020239 | 2.987273  | 0.000016  |

**Table S22.** Geometries for **IM-2**.

| Atom | <i>x</i>  | <i>y</i>  | <i>z</i>  |
|------|-----------|-----------|-----------|
| O    | 2.397613  | 0.808838  | -0.046827 |
| O    | 1.929685  | -1.296172 | -0.073224 |
| N    | -0.407197 | 2.704613  | 0.106828  |
| N    | -2.732383 | 0.352088  | -0.382594 |
| N    | -2.148686 | -0.437967 | 0.255104  |
| N    | 1.611894  | -0.107766 | -0.036383 |
| C    | -0.121503 | 1.590046  | 0.061917  |
| C    | -0.744016 | -0.782068 | 0.067763  |
| C    | 0.203960  | 0.211397  | 0.018416  |
| N    | -0.563079 | -2.093116 | 0.047065  |
| H    | 0.384431  | -2.442080 | -0.019679 |
| H    | -1.357298 | -2.700457 | 0.161365  |

**Table S23.** Geometries for **TS-2**.

| Atom | <i>x</i>  | <i>y</i>  | <i>z</i>  |
|------|-----------|-----------|-----------|
| O    | -2.489226 | 0.682947  | -0.046400 |
| O    | -1.882639 | -1.390415 | -0.036691 |
| N    | 0.278367  | 2.736210  | 0.051138  |
| N    | 3.083094  | 0.215223  | -0.077195 |
| N    | 2.018253  | -0.202844 | -0.039063 |
| N    | -1.637867 | -0.179117 | -0.022593 |
| C    | -0.016104 | 1.621150  | 0.039536  |
| C    | 0.778551  | -0.694719 | 0.023514  |
| C    | -0.276804 | 0.235147  | 0.025779  |
| N    | 0.673064  | -2.042843 | 0.129177  |
| H    | -0.278305 | -2.381970 | 0.036065  |
| H    | 1.434983  | -2.614158 | -0.194561 |

**Table S24.** Geometries for **IM-3**.

| Atom | <i>x</i>  | <i>y</i>  | <i>z</i>  |
|------|-----------|-----------|-----------|
| O    | 2.397792  | 0.808212  | 0.047477  |
| O    | 1.929409  | -1.296637 | 0.072945  |
| N    | -0.405889 | 2.704881  | -0.107005 |
| N    | -2.732699 | 0.352915  | 0.382511  |
| N    | -2.149088 | -0.437696 | -0.254560 |
| N    | 1.611882  | -0.108155 | 0.036396  |
| C    | -0.121041 | 1.590055  | -0.062201 |
| C    | -0.744200 | -0.781876 | -0.067938 |
| C    | 0.204002  | 0.211340  | -0.018772 |
| N    | -0.563604 | -2.092988 | -0.047194 |
| H    | 0.383812  | -2.442266 | 0.018945  |
| H    | -1.358196 | -2.700137 | -0.159897 |

**Table S25.** Geometries for **TS-3**.

| Atom | <i>x</i>  | <i>y</i>  | <i>z</i>  |
|------|-----------|-----------|-----------|
| N    | 1.087265  | -1.745571 | 0.000049  |
| H    | 2.055098  | -2.034995 | 0.000028  |
| H    | 0.330561  | -2.419568 | 0.000040  |
| C    | 0.784230  | -0.472312 | 0.000052  |
| C    | -0.374708 | 0.228164  | 0.000033  |
| N    | -1.641456 | -0.480056 | -0.000018 |
| O    | -1.592360 | -1.707870 | -0.000001 |
| O    | -2.657594 | 0.170853  | -0.000072 |
| C    | -0.424943 | 1.645568  | 0.000025  |
| N    | -0.441194 | 2.796619  | 0.000015  |
| N    | 3.262105  | 0.051904  | -0.000171 |
| N    | 2.262778  | 0.568844  | 0.000104  |

**Table S26.** Geometries for **C**.

| Atom | <i>x</i>  | <i>y</i>  | <i>z</i>  |
|------|-----------|-----------|-----------|
| N    | -2.106263 | -1.245330 | 0.019961  |
| H    | -2.672735 | -1.979330 | -0.374398 |
| H    | -2.553878 | -0.403547 | 0.372394  |
| C    | -0.809719 | -1.256943 | -0.107877 |
| C    | 0.196848  | -0.371623 | -0.026941 |
| N    | -0.099904 | 1.062942  | -0.010823 |
| O    | -1.275939 | 1.378103  | 0.122056  |
| O    | 0.822783  | 1.832377  | -0.122204 |
| C    | 1.561481  | -0.754639 | 0.029367  |
| N    | 2.657624  | -1.103574 | 0.081704  |

## 5. NMR Spectra

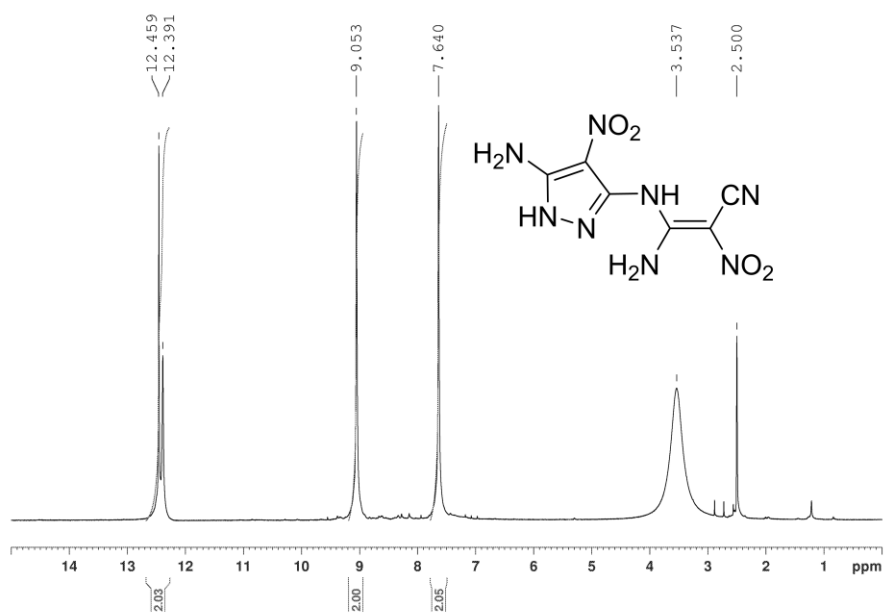

Figure S1. <sup>1</sup>H NMR spectrum of **2**.

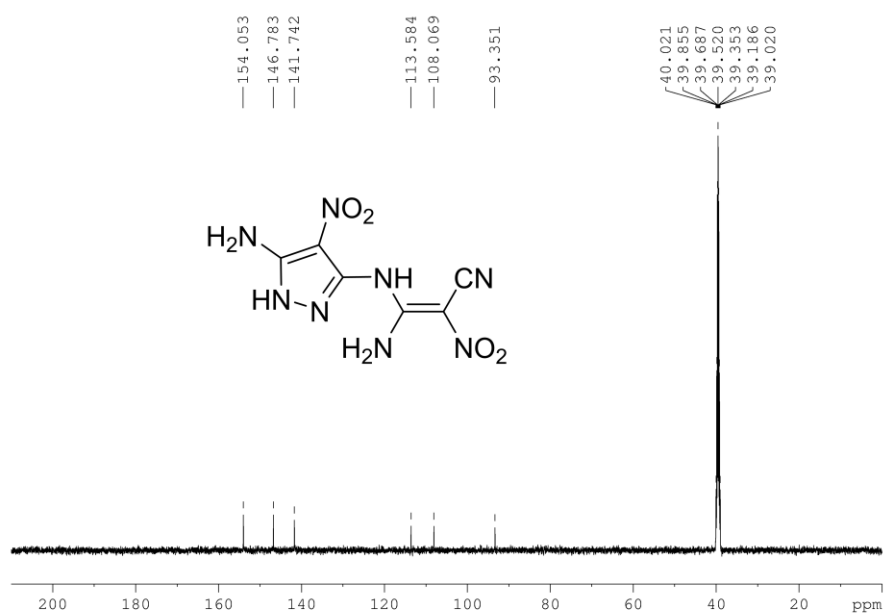

Figure S2. <sup>13</sup>C NMR spectrum of **2**.

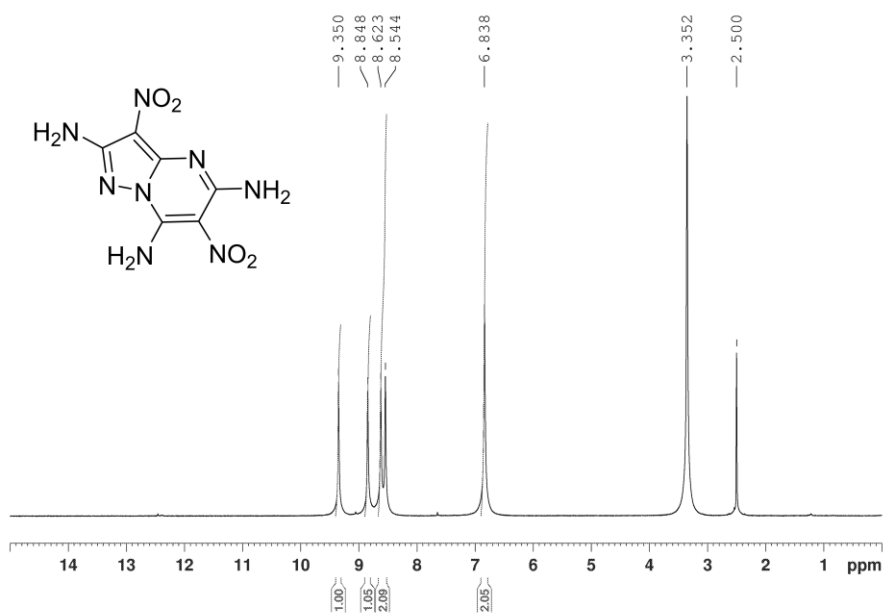

**Figure S3.**  $^1\text{H NMR}$  spectrum of **3**.

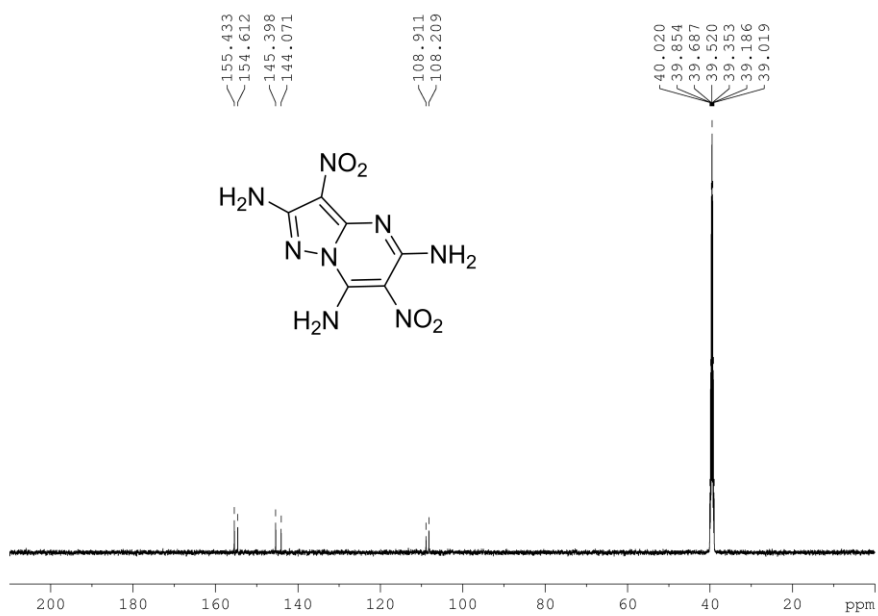

**Figure S4.**  $^{13}\text{C NMR}$  spectrum of **3**.



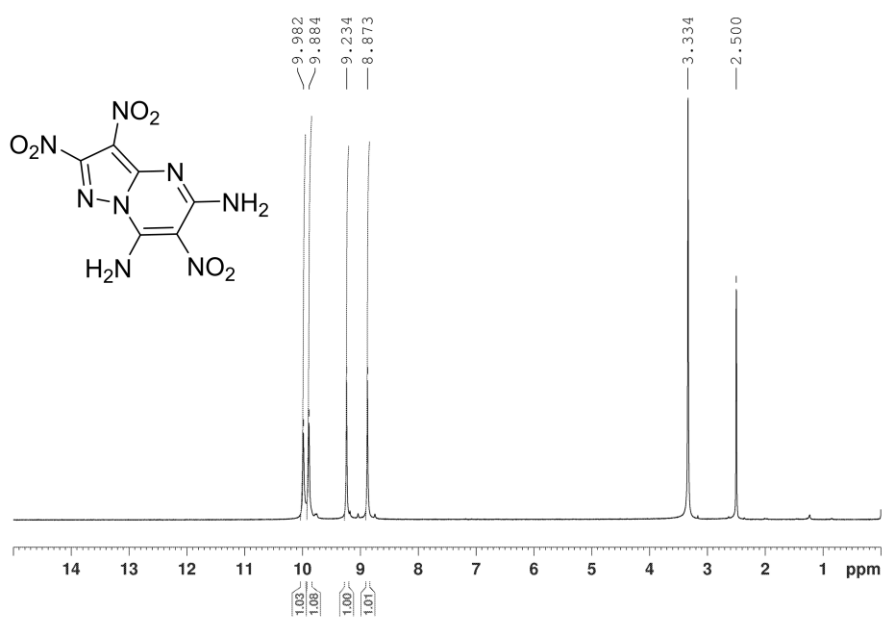

Figure S5.  $^1\text{H}$  NMR spectrum of 4.

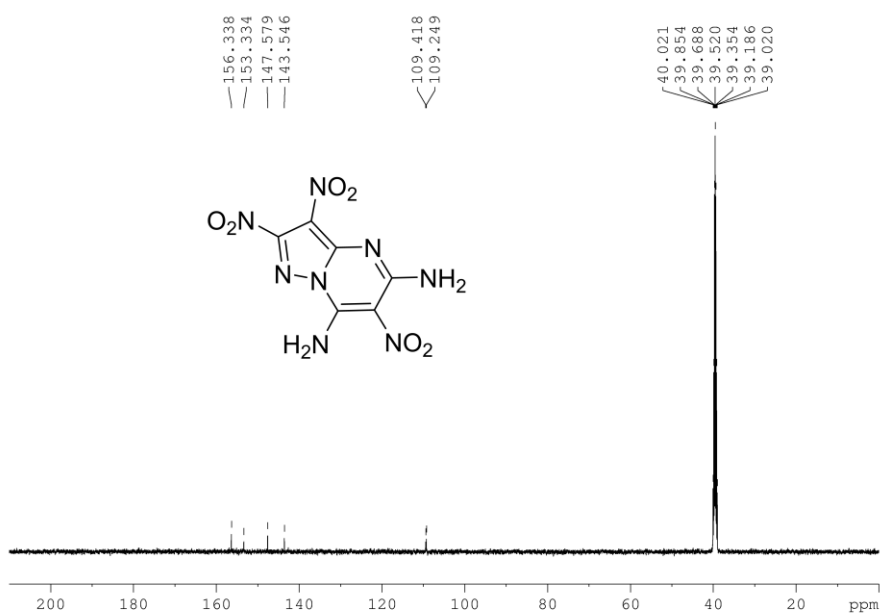

Figure S6.  $^{13}\text{C}$  NMR spectrum of 4.

## 6. DSC Plots

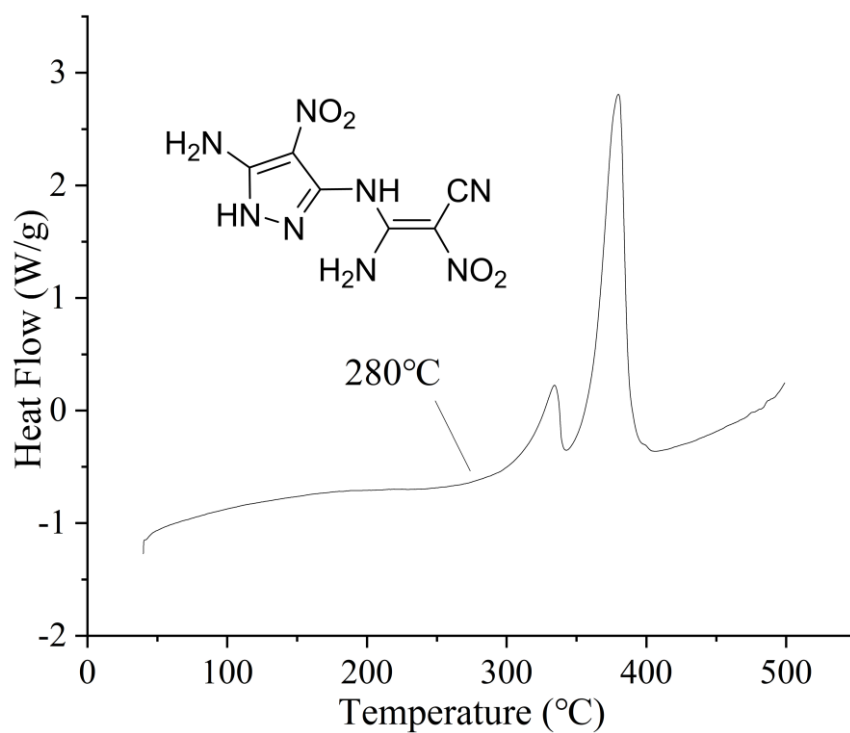

Figure S7. DSC plot of 2.

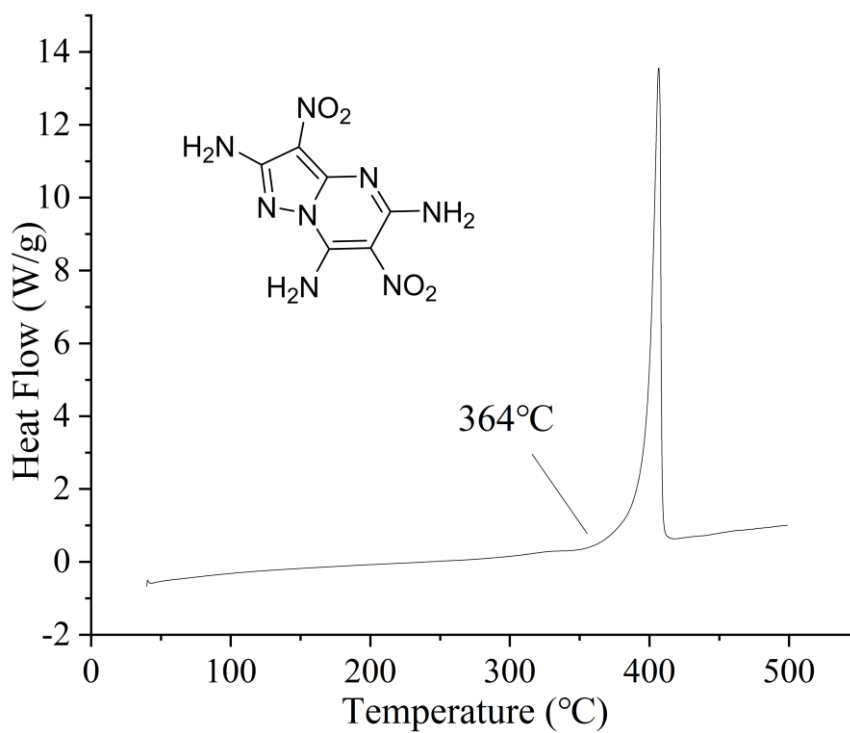

Figure S8. DSC plot of 3.

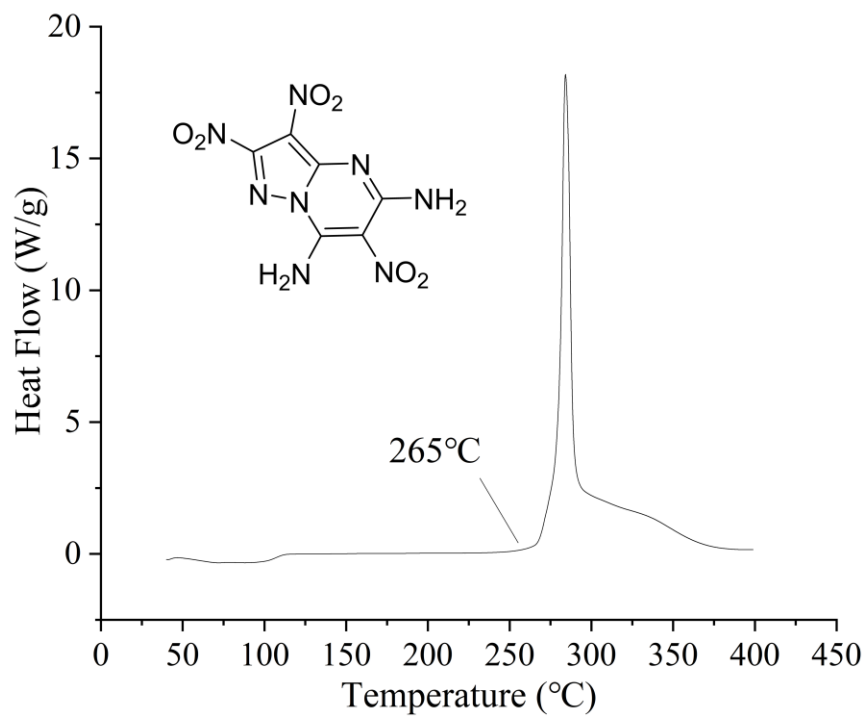

**Figure S9.** DSC plot of 4.

## 7. ESR Measurement

Electron spin resonance (ESR) spectroscopy was investigated through the reaction of **1**, NBS in DMF, together with 5,5-dimethyl-1-pyrroline N-oxide (DMPO) as a radical trap. ESR spectra were recorded and given in Figure S10 (a). Twenty signals with a  $g$ -value of 2.003 were observed. This is another direct proof of the existence of nitrogen-centered radical. In addition, theoretical spectra were simulated and shown in Figure S10 (b). By comparing experimental and simulated plots, the simulated spectra of the hyperfine structure on the free radical are in good agreement with experimental results. Based on the measured spectra and references,<sup>6</sup> the nitrogen-centered radical pathway was further confirmed.

Room temperature ESR spectra of sample powder were obtained using a JEOL JES FA200 ESR spectrometer (9.1GHz, X-band). Microwave power employed was 2 mW, sweep width ranged from 320 to 330 mT, modulation frequency was 100 kHz, time constant was 0.1 s and measure time was 2 min, respectively. The simulation of the hyperfine structure on the radical was taken by the Easyspin and matlab software.

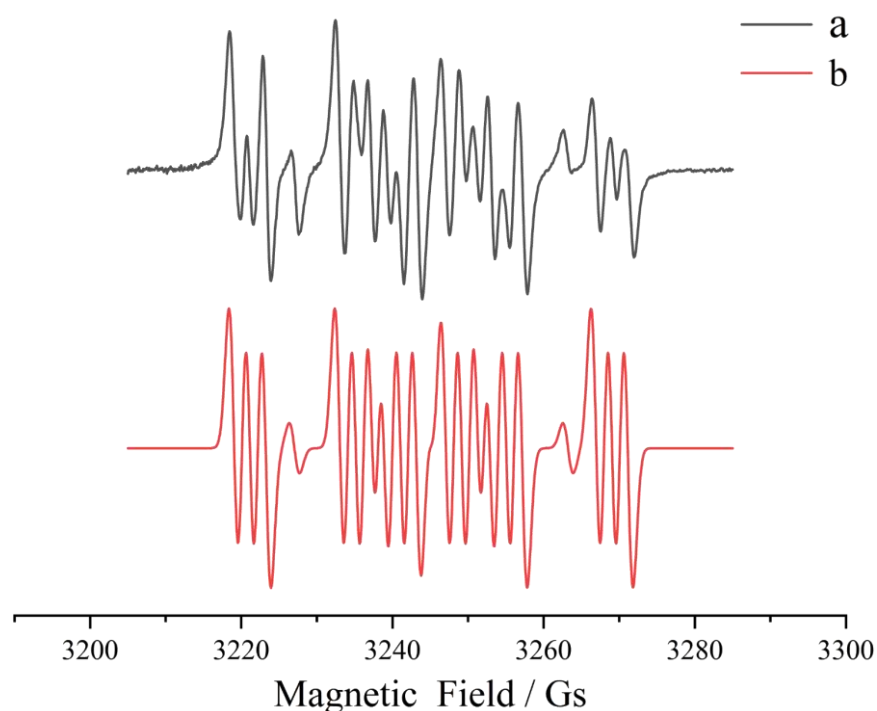

**Figure S10.** X-band ESR spectra from radical experiment (a) and simulation (b).

## 8. References

- 1 M. J. Frisch, G. W. Trucks, H. B. Schlegel, G. E. Scuseria, M. A. Robb, J. R. Cheeseman, G. Scalmani, V. Barone, B. Mennucci, G. A. Petersson, H. Nakatsuji, M. Caricato, X. Li, H. P. Hratchian, A. F. Izmaylov, J. Bloino, G. Zheng, J. L. Sonnenberg, M. Hada, M. Ehara, K. Toyota, R. Fukuda, J. Hasegawa, M. Ishida, T. Nakajima, Y. Honda, O. Kitao, H. Nakai, T. Vreven, J. A. Montgomery, Jr. J. E. Peralta, F. Ogliaro, M. Bearpark, J. J. Heyd, E. Brothers, K. N. Kudin, V. N. Staroverov, T. Keith, R. Kobayashi, J. Normand, K. Raghavachari, A. Rendell, J. C. Burant, S. S. Iyengar, J. Tomasi, M. Cossi, N. Rega, J. M. Millam, M. Klene, J. E. Knox, J. B. Cross, V. Bakken, C. Adamo, J. Jaramillo, R. Gomperts, R. E. Stratmann, O. Yazyev, A. J. Austin, R. Cammi, C. Pomelli, J. W. Ochterski, R. L. Martin, K. Morokuma, V. G. Zakrzewski, G. A. Voth, P. Salvador, J. J. Dannenberg, S. Dapprich, A. D. Daniels, O. Farkas, J. B. Foresman, J. V. Ortiz, J. Cioslowski, and D. J. Fox, Gaussian, Inc., Wallingford CT, 2013.
- 2 F. Neese, *WIREs Comput. Mol. Sci.*, 2012, **2**, 73–78.
- 3 K. Fukui, *Acc. Chem. Res.*, 1981, **14**, 363–368.
- 4 M. S. Westwell, M. S. Searle, D. J. Wales, and D. H. Williams, *J. Am. Chem. Soc.* 1995, **117**, 5013–5015.
- 5 D. R. Lide, ed., CRC Handbook of Chemistry and Physics, 88th Edition (Internet Version 2008), CRC Press/Taylor and Francis, Boca Raton, FL.
- 6 Z. Zeng, Y. Liu, G. Cheng, W. Huang, H. Wei, J. M. Shreeve, and Y. Tang, *J. Mater. Chem. A*, 2021, **9**, 21685–21688.
